# Supplementary material
Source: Springer Nature journal article supplement (https://www.springermedizin.de/resource/supplementary/12885_2011_2954_MOESM13_ESM.pdf/9462398)

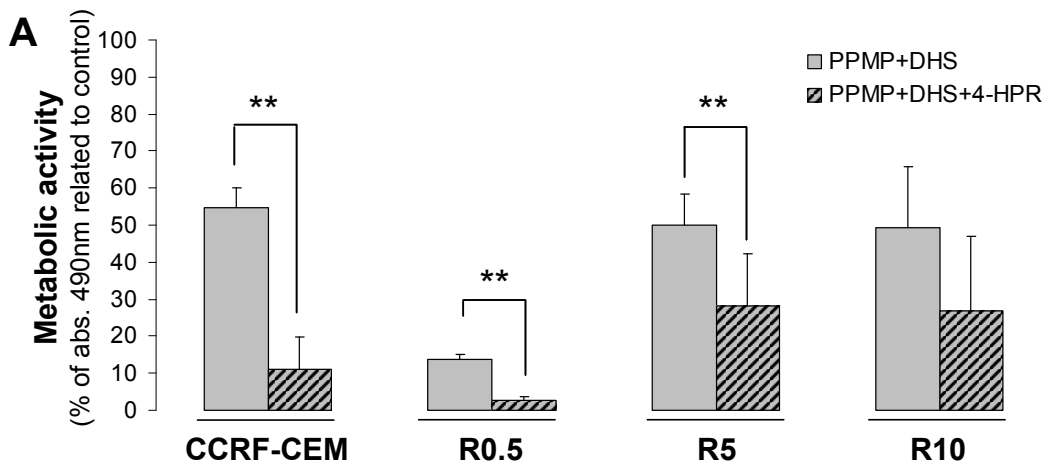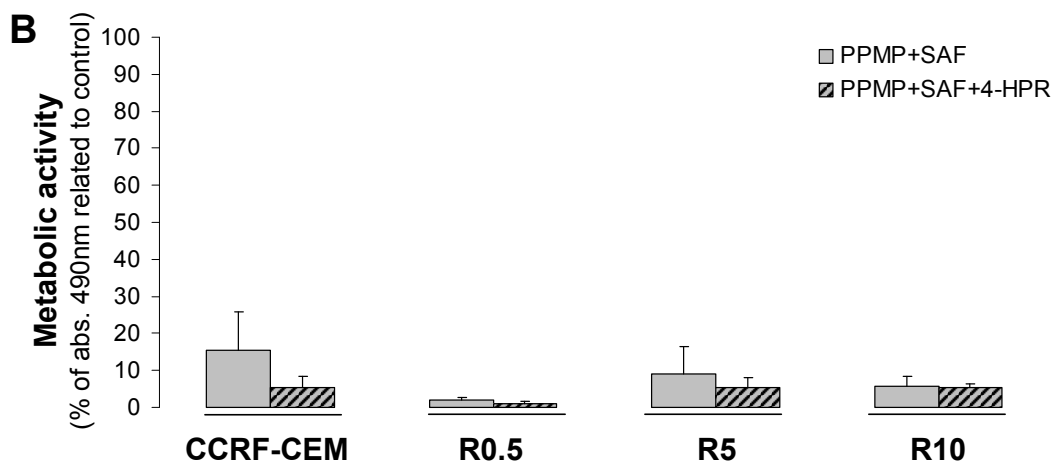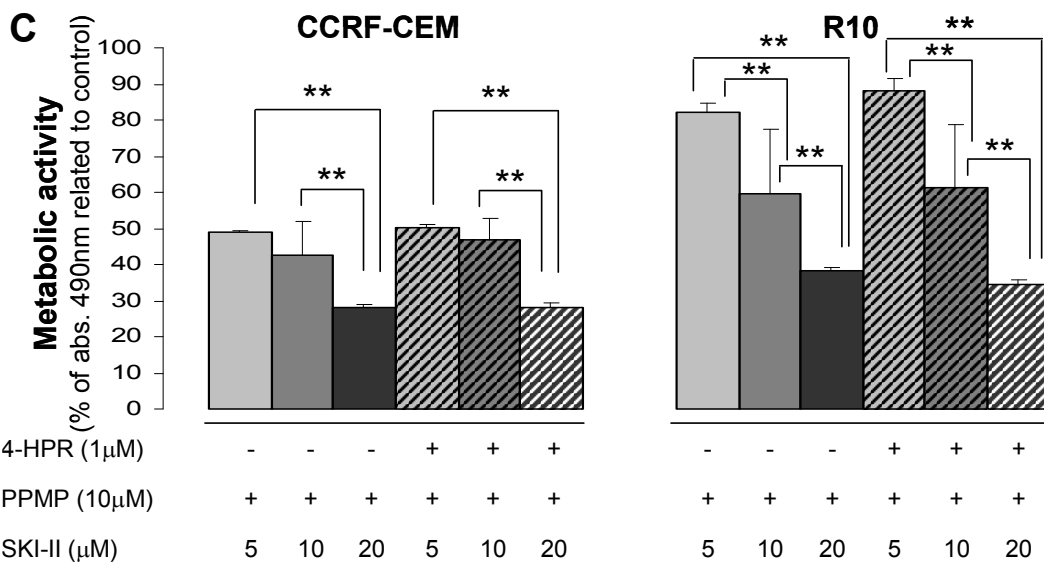

Supplement: MOESM13 [file 9462398]
